# Supplementary material for: Development of highly gas-permeable polymers by metathesis copolymerization of 1-(p-trimethylsilyl)phenyl-1-propyne with tert-butyl and silyl group-containing diphenylacetylenes
Source: Royal Society of Chemistry journal article supplement (doi:10.1039/d1ra06363d), 2021-01-01
Supplement: d1ra06363d1.pdf [file d1ra06363d1.pdf]

Supplementary information for

Development of highly gas-permeable polymers by metathesis  
copolymerization of 1-(*p*-trimethylsilyl)phenyl-1-propyne with *tert*-  
butyl and silyl group-containing diphenylacetylenes

Yi Lin, Jianrong Dong, Toshikazu Sakaguchi\*, Tamotsu Hashimoto

Department of Materials Science and Engineering, Graduate School of  
Engineering, University of Fukui, Bunkyo, Fukui 910-8507, Japan

Corresponding Author: [sakaguchi@matse.u-fukui.ac.jp](mailto:sakaguchi@matse.u-fukui.ac.jp)

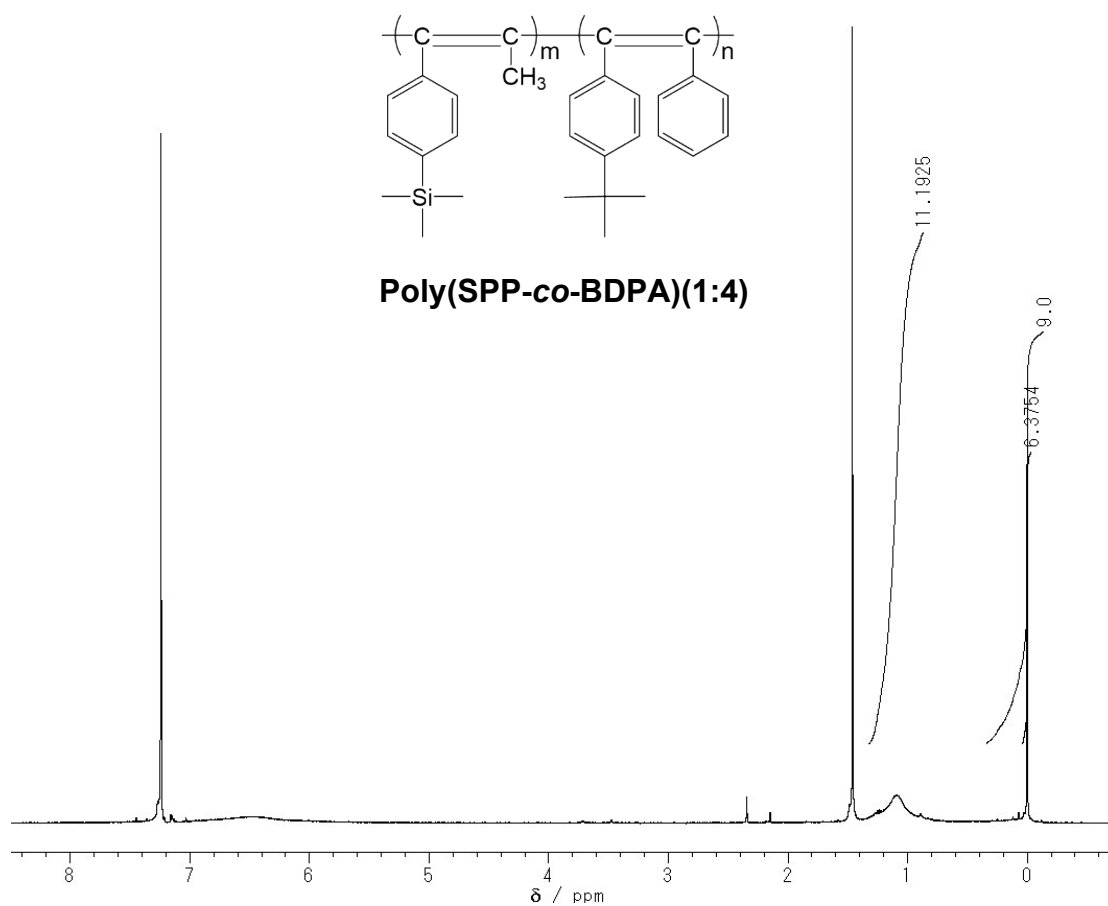

**Figure S1.** <sup>1</sup>H-NMR spectrum of **Poly(SPP-co-BDPA)(1:4)**.

Integration of <sup>1</sup>H of methyl groups

$$3m + 9n = 11.1925$$

Integration of <sup>1</sup>H of silyl groups

$$9m = 9.0 - 6.3754$$

Composition ratio of **Poly(SPP-co-BDPA)(1:4)**:

$$m:n \approx 1:3.93$$

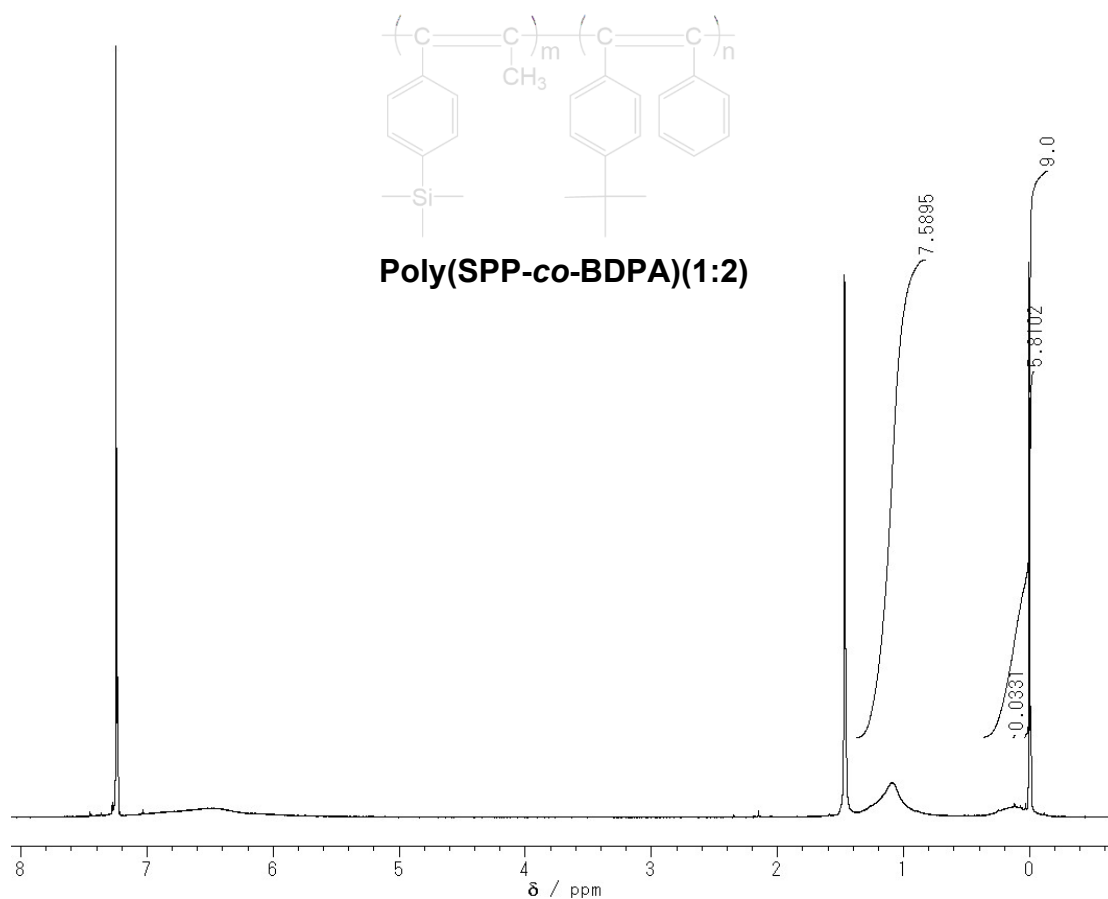

**Figure S2.** <sup>1</sup>H-NMR spectrum of **Poly(SPP-co-BDPA)(1:2)**.

Integration of <sup>1</sup>H of methyl groups

$$3m + 9n = 7.5895$$

Integration of <sup>1</sup>H of silyl groups

$$9m = 9.0 - 5.8102 - 0.0331$$

Composition ratio of **Poly(SPP-co-BDPA)(1:2)**:

$$m:n \approx 1:2.07$$

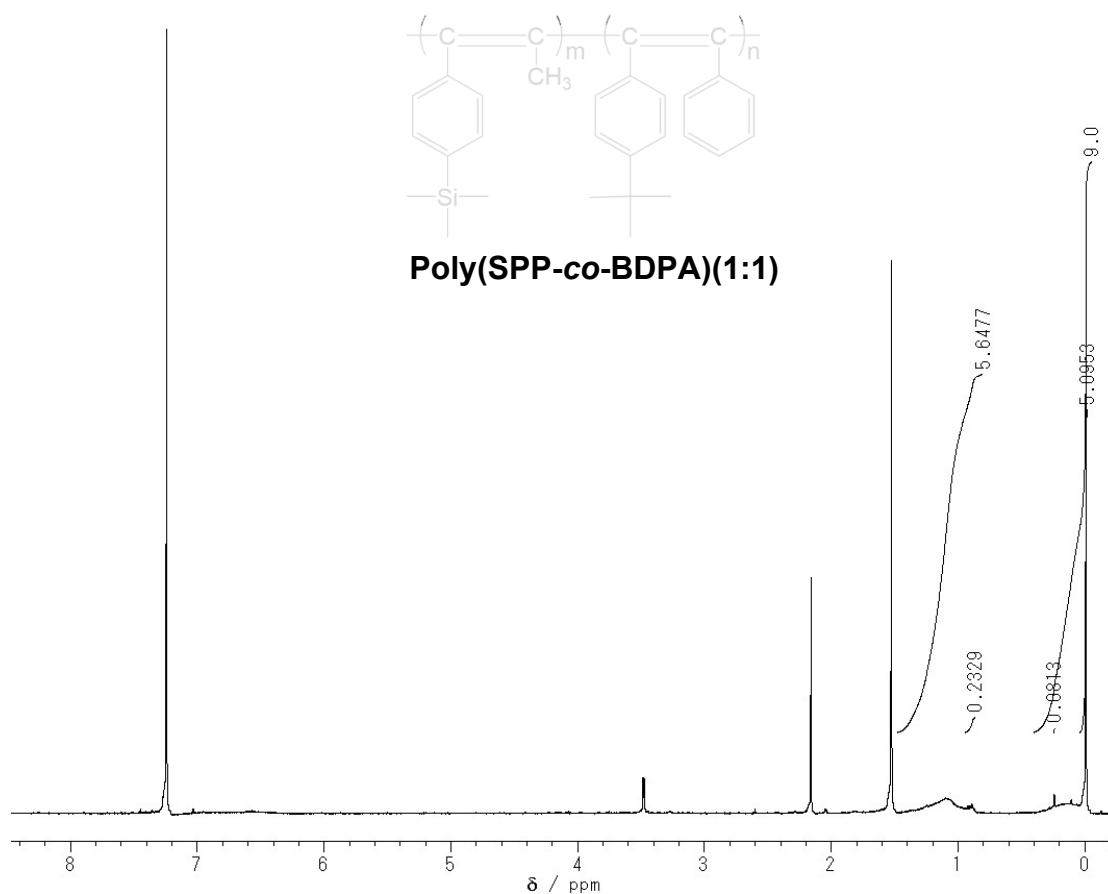

**Figure S3.** <sup>1</sup>H-NMR spectrum of **Poly(SPP-co-BDPA)(1:1)**.

Integration of <sup>1</sup>H of methyl groups

$$3m + 9n = 5.6477 - 0.2329$$

Integration of <sup>1</sup>H of silyl groups

$$9m = 9.0 - 5.0953 - 0.0813$$

Composition ratio of **Poly(SPP-co-BDPA)(1:1)**:

$$m:n \approx 1:1.08$$

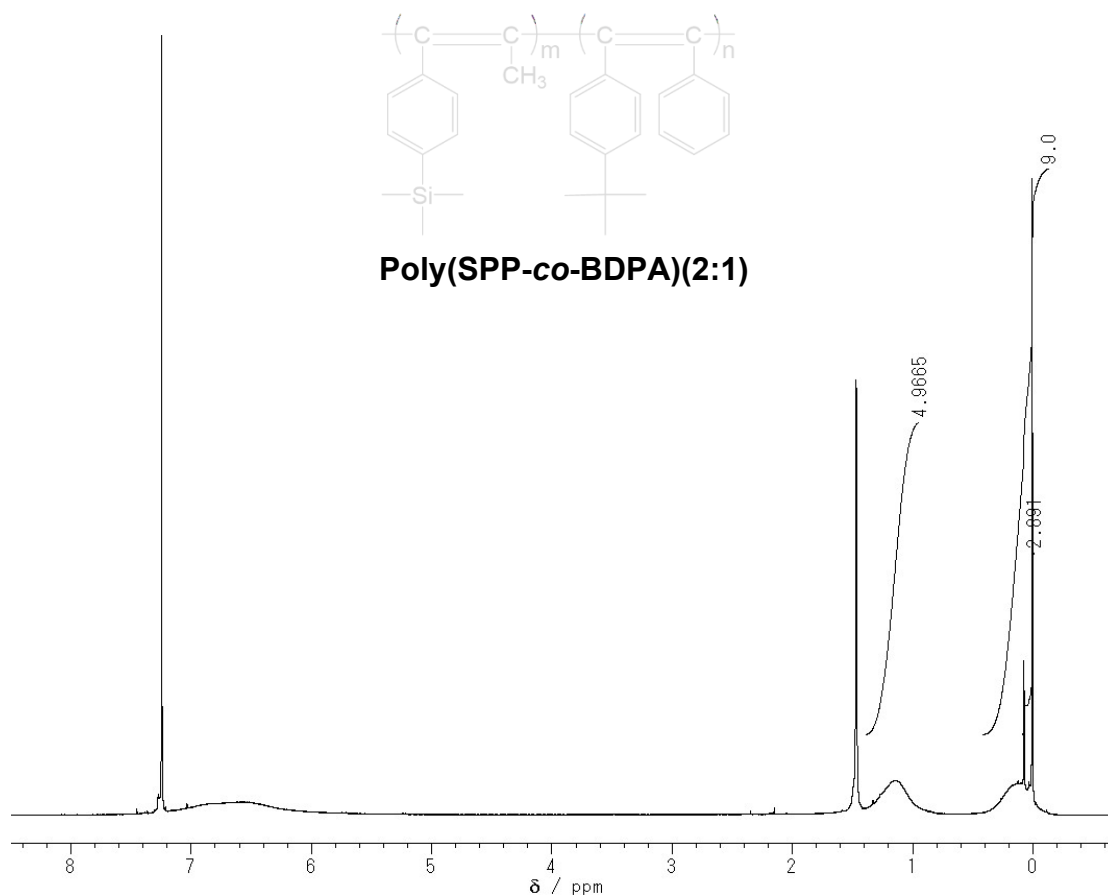

**Figure S4.** <sup>1</sup>H-NMR spectrum of **Poly(SPP-co-BDPA)(2:1)**.

Integration of <sup>1</sup>H of methyl groups

$$3m + 9n = 4.9665$$

Integration of <sup>1</sup>H of silyl groups

$$9m = 9.0 - 2.891$$

Composition ratio of **Poly(SPP-co-BDPA)(2:1)**:

$$m:n \approx 2.08:1$$

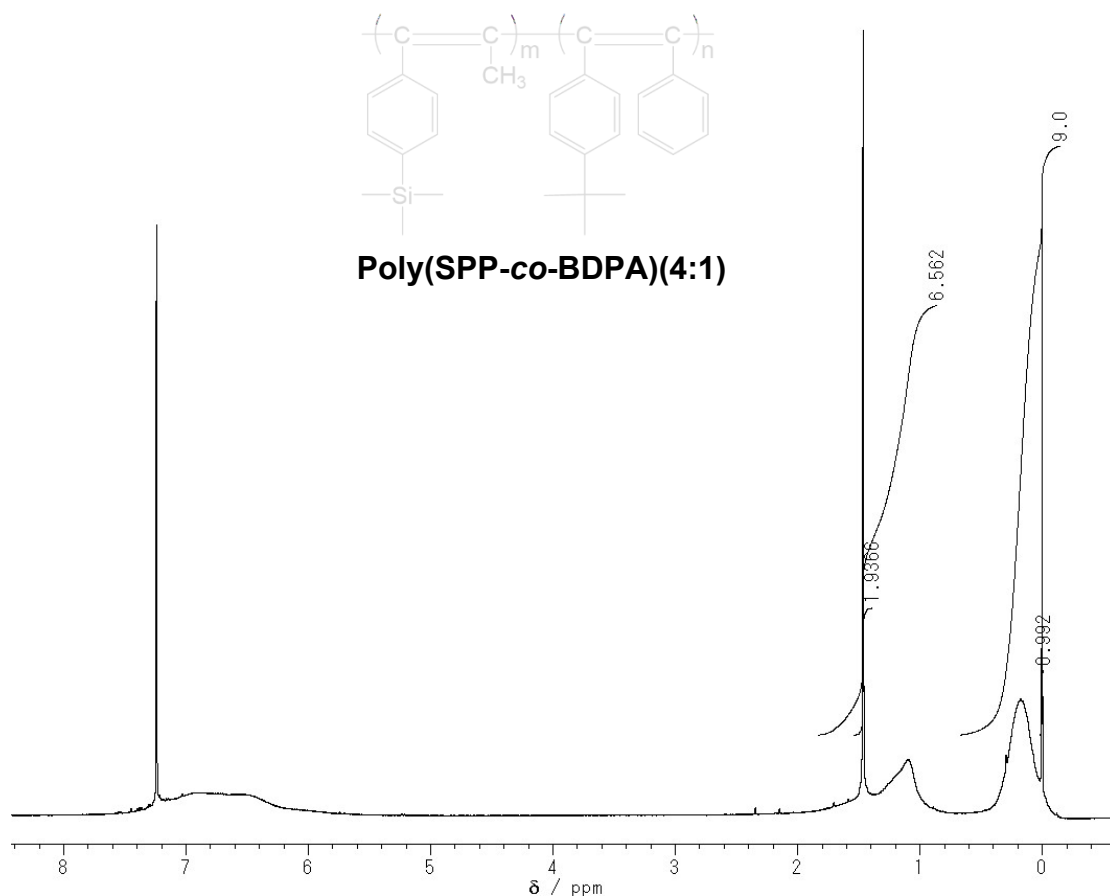

**Figure S5.** <sup>1</sup>H-NMR spectrum of **Poly(SPP-co-BDPA)(4:1)**.

Integration of <sup>1</sup>H of methyl groups

$$3m + 9n = 6.562 - 1.9366$$

Integration of <sup>1</sup>H of silyl groups

$$9m = 9.0 - 0.992$$

Composition ratio of **Poly(SPP-co-BDPA)(4:1)**:

$$m:n \approx 4.09:1$$

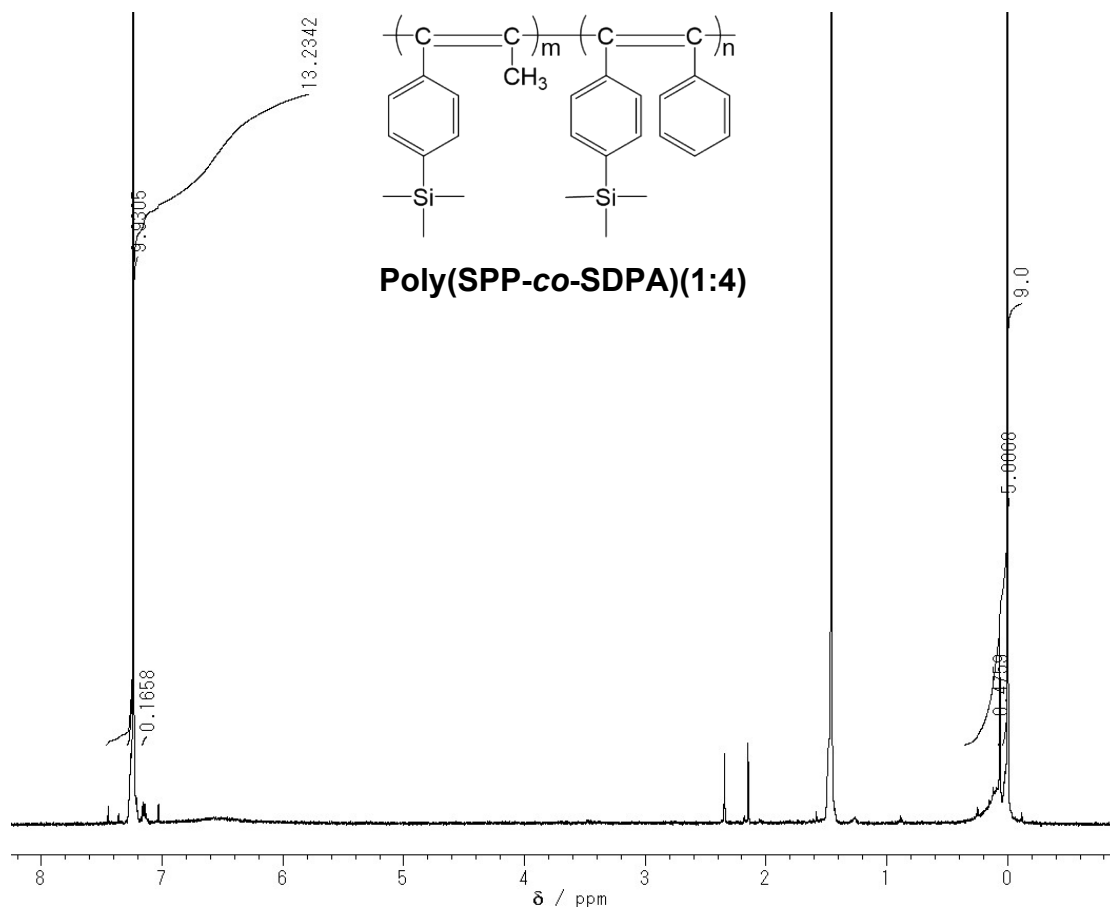

**Figure S6.** <sup>1</sup>H-NMR spectrum of **Poly(SPP-co-SDPA)(1:4)**.

Integration of <sup>1</sup>H of phenyl groups

$$4m + 9n = 13.2342 - 9.9305 - 0.1658$$

Integration of <sup>1</sup>H of silyl groups

$$9m + 9n = 9.0 - 5.0068 - 0.4759$$

Composition ratio of **Poly(SPP-co-SDPA)(1:4)**:

$$m:n \approx 1:4.15$$

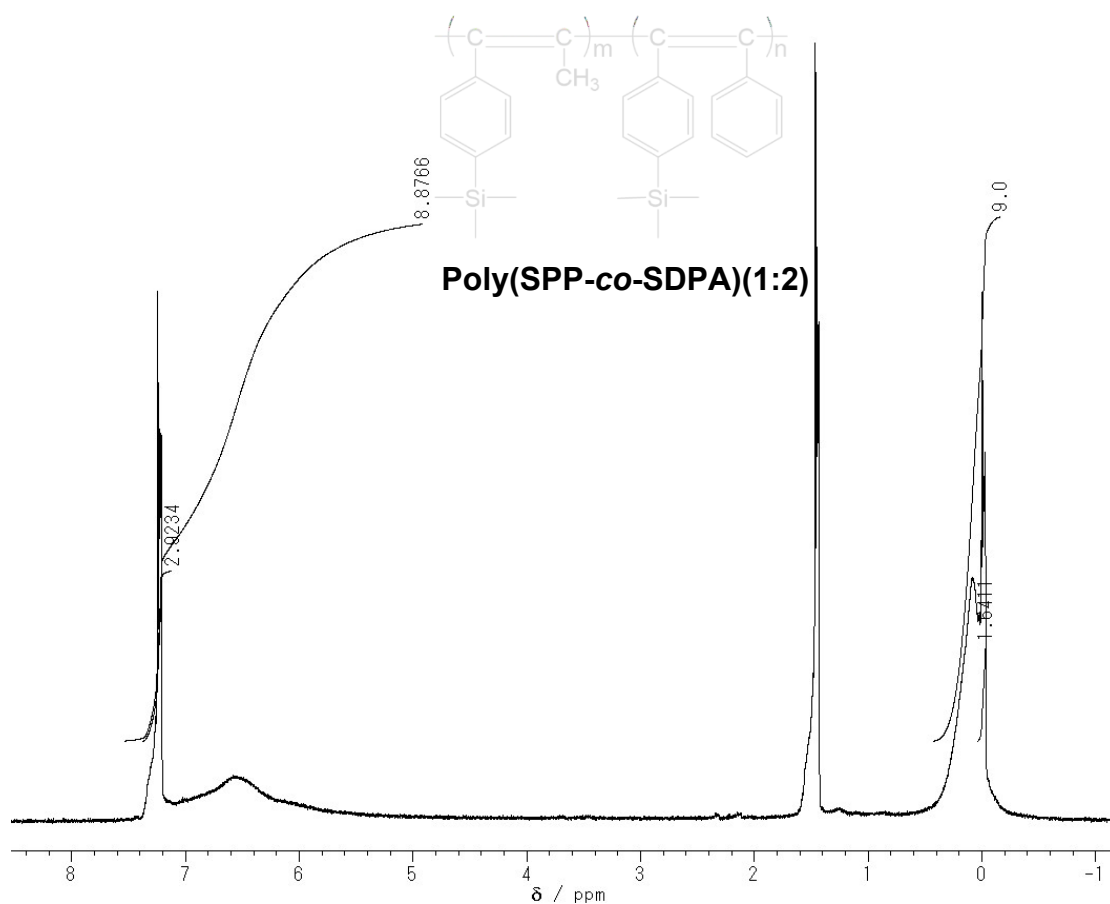

**Figure S7.** <sup>1</sup>H-NMR spectrum of **Poly(SPP-co-SDPA)(1:2)**.

Integration of <sup>1</sup>H of phenyl groups

$$4m + 9n = 8.8766 - 2.9234$$

Integration of <sup>1</sup>H of silyl groups

$$9m + 9n = 9.0 - 1.6411$$

Composition ratio of **Poly(SPP-co-SDPA)(1:2)**:

$$m:n \approx 1:1.91$$



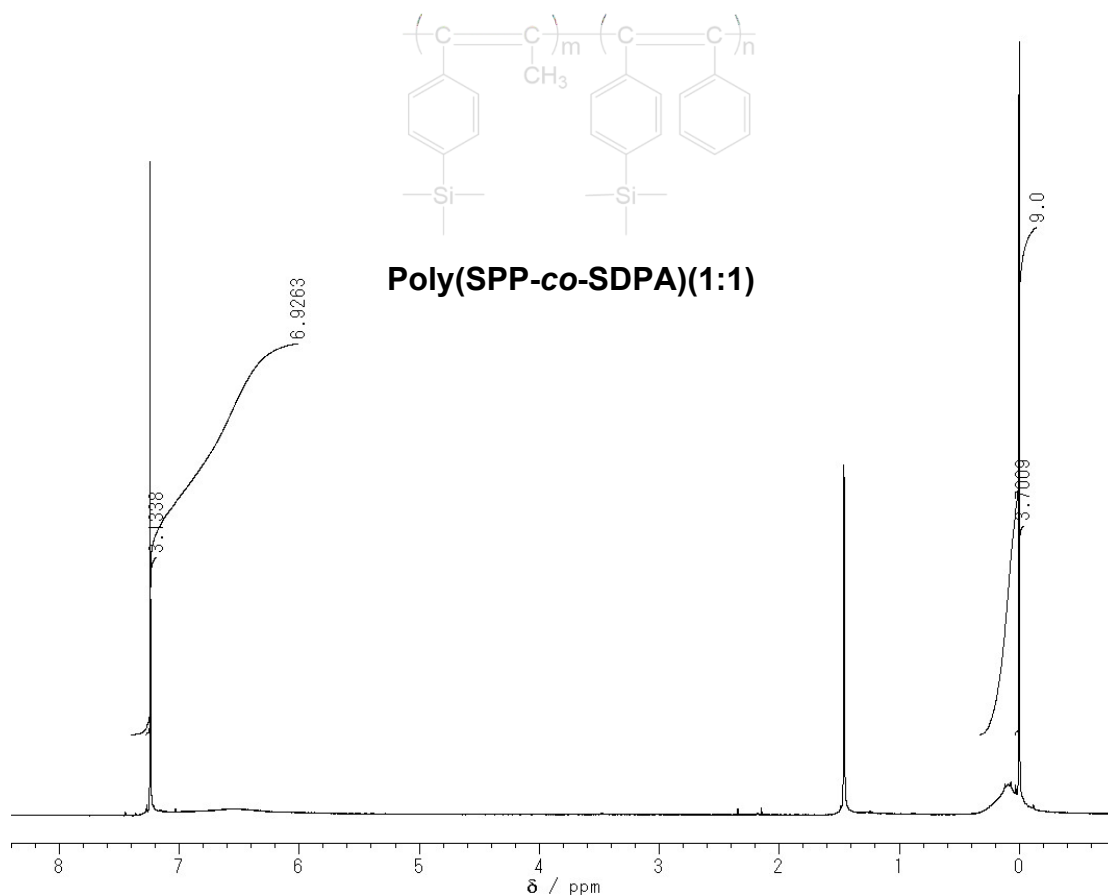

**Figure S8.** <sup>1</sup>H-NMR spectrum of **Poly(SPP-co-SDPA)(1:1)**.

Integration of <sup>1</sup>H of phenyl groups

$$4m + 9n = 6.9263 - 3.1338$$

Integration of <sup>1</sup>H of silyl groups

$$9m + 9n = 9.0 - 3.7009$$

Composition ratio of **Poly(SPP-co-SDPA)(1:1)**:

$$m:n \approx 1:0.95$$

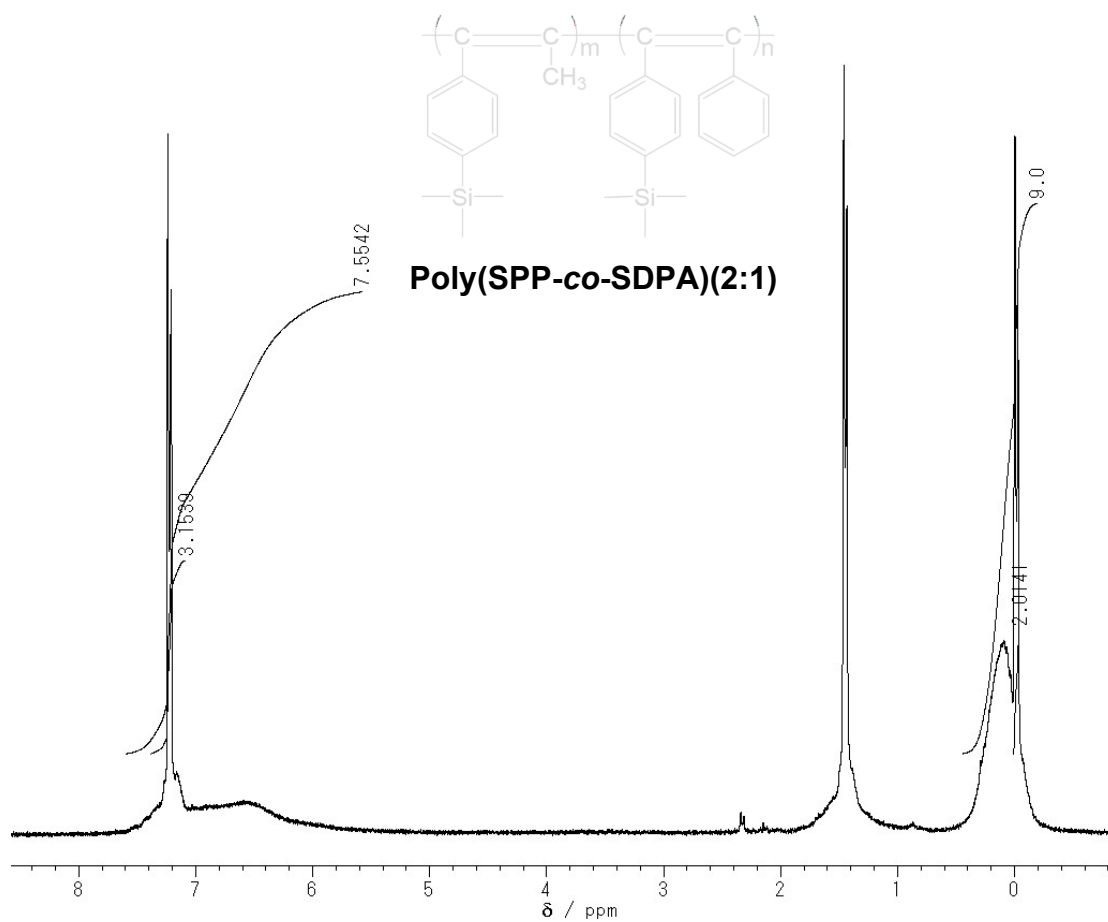

**Figure S9.** <sup>1</sup>H-NMR spectrum of **Poly(SPP-co-SDPA)(2:1)**.

Integration of <sup>1</sup>H of phenyl groups

$$4m + 9n = 7.5542 - 3.1539$$

Integration of <sup>1</sup>H of silyl groups

$$9m + 9n = 9.0 - 2.0141$$

Composition ratio of **Poly(SPP-co-SDPA)(2:1)**:

$$m:n \approx 2.00:1$$

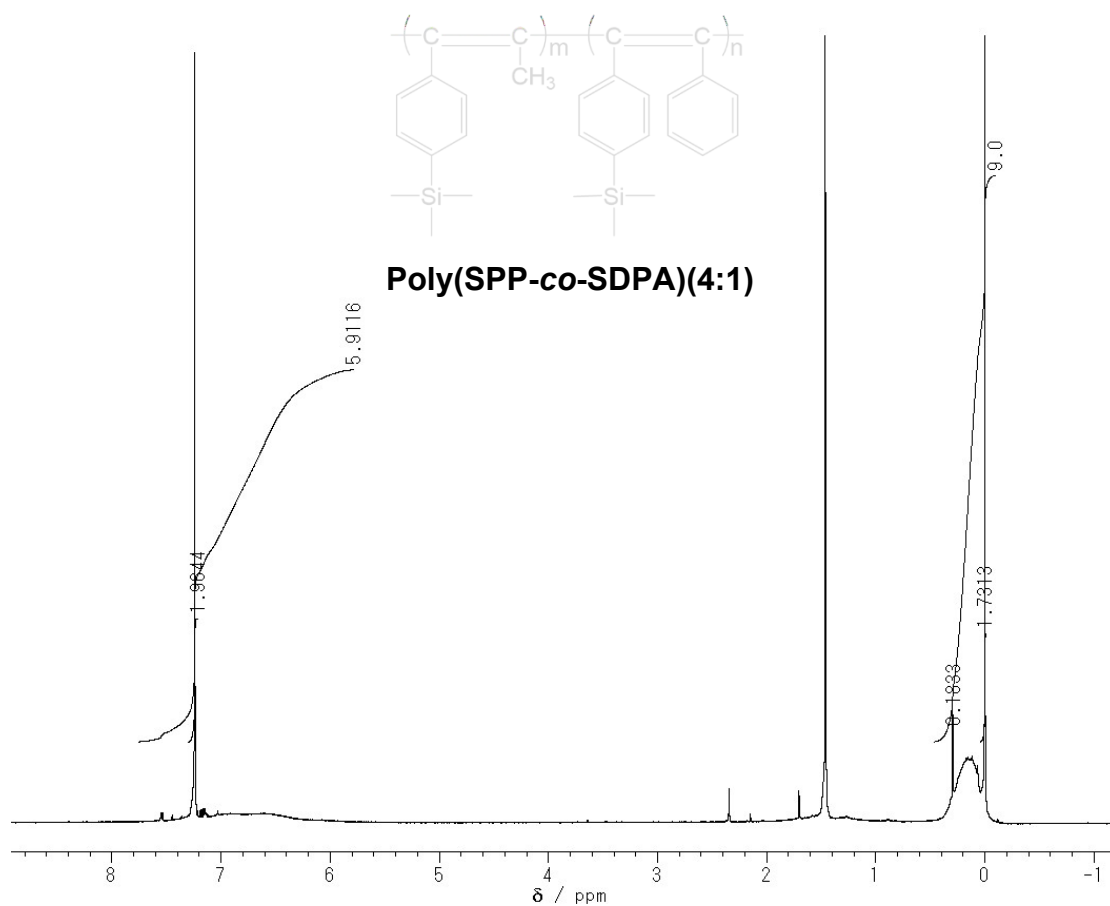

**Figure S10.** <sup>1</sup>H-NMR spectrum of **Poly(SPP-co-SDPA)(4:1)**.

Integration of <sup>1</sup>H of phenyl groups

$$4m + 9n = 5.9116 - 1.9644$$

Integration of <sup>1</sup>H of silyl groups

$$9m + 9n = 9.0 - 1.7313 - 0.1833$$

Composition ratio of **Poly(SPP-co-SDPA)(4:1)**:

$$m:n \approx 3.98:1$$

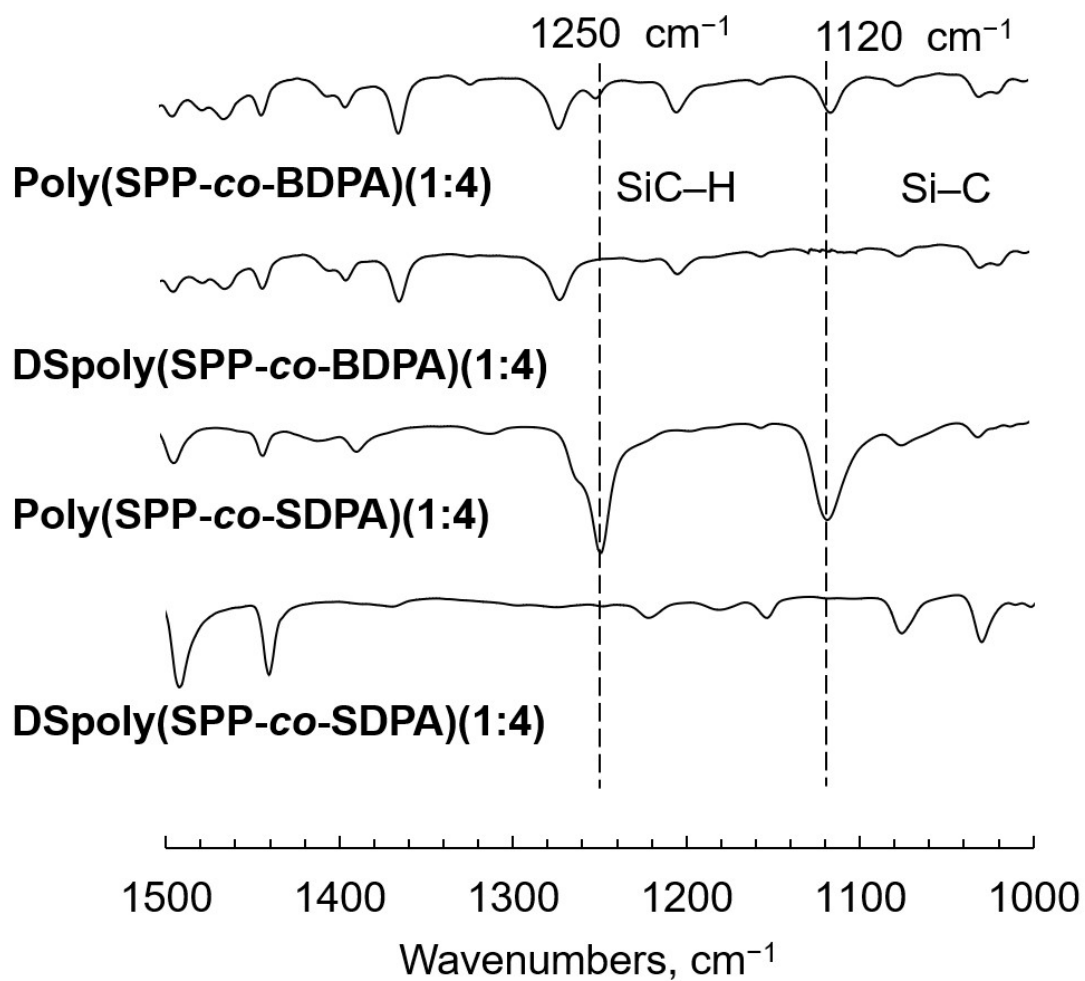

**Figure S11.** FT-IR spectra of **Poly(SPP-co-BDPA)(1:4)**, **Poly(SPP-co-SDPA)(1:4)**, **DSpoly(SPP-co-BDPA)(1:4)** and **DSpoly(SPP-co-SDPA)(1:4)**.

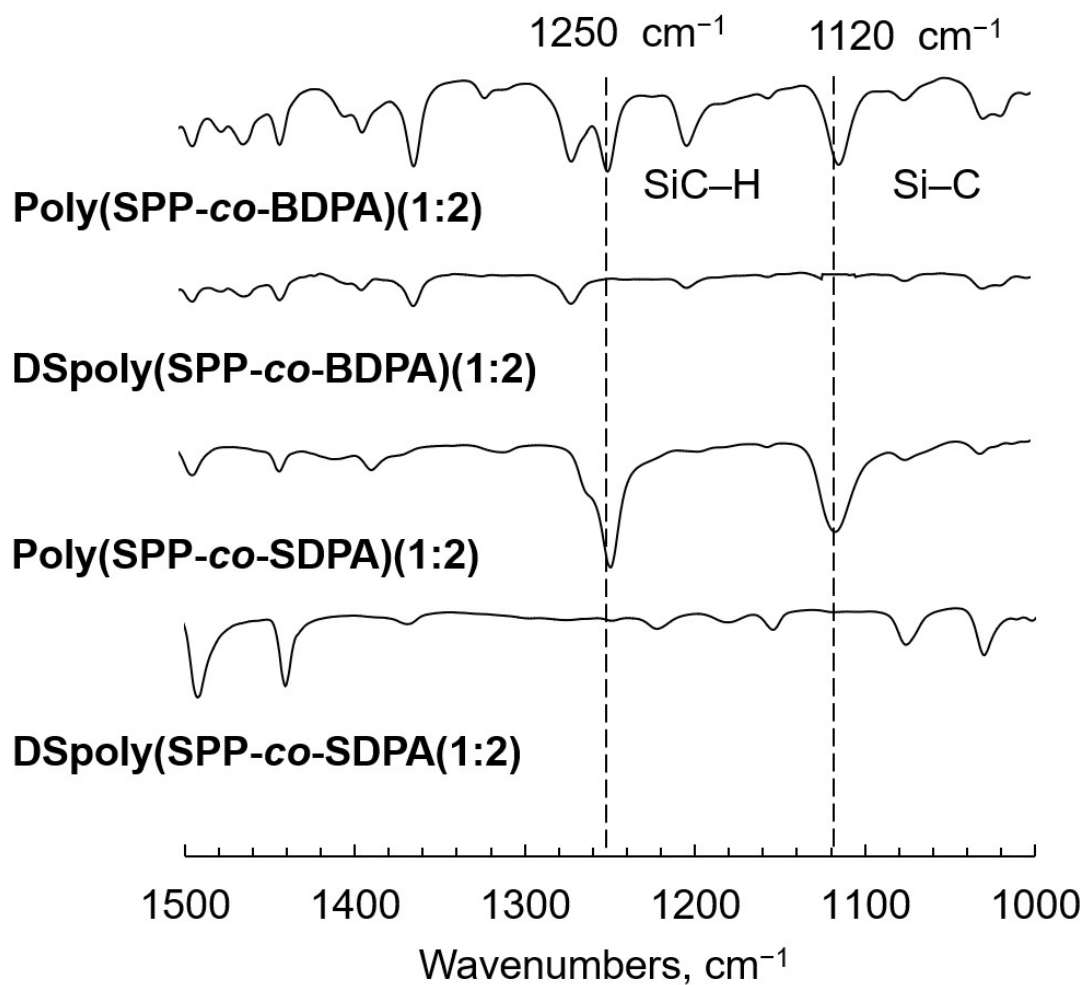

**Figure S12.** FT-IR spectra of **Poly(SPP-co-BDPA)(1:2)**, **Poly(SPP-co-SDPA)(1:2)**, **DSpoly(SPP-co-BDPA)(1:2)** and **DSpoly(SPP-co-SDPA)(1:2)**.

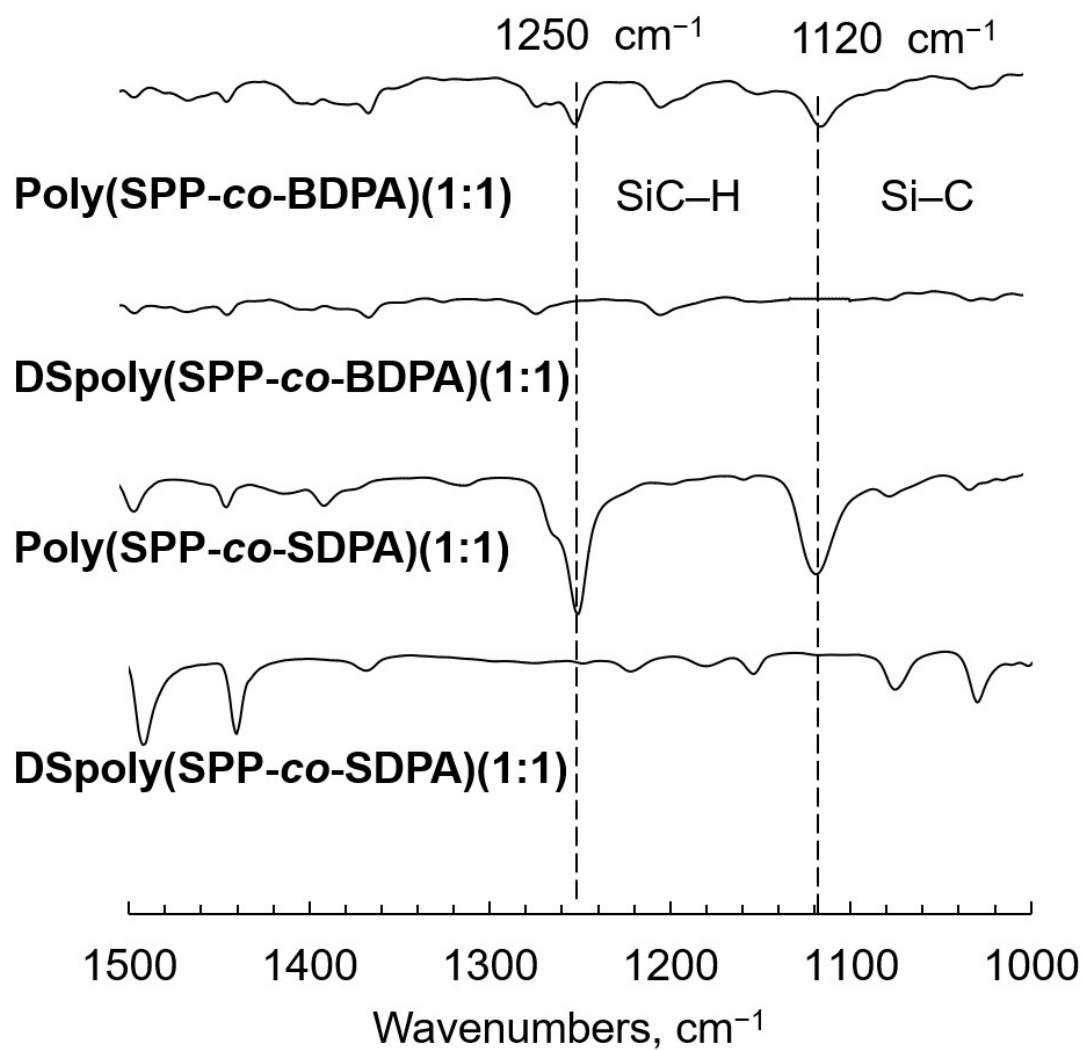

**Figure S13.** FT-IR spectra of **Poly(SPP-co-BDPA)(1:1)**, **Poly(SPP-co-SDPA)(1:1)**, **DSPoly(SPP-co-BDPA)(1:1)** and **DSPoly(SPP-co-SDPA)(1:1)**.

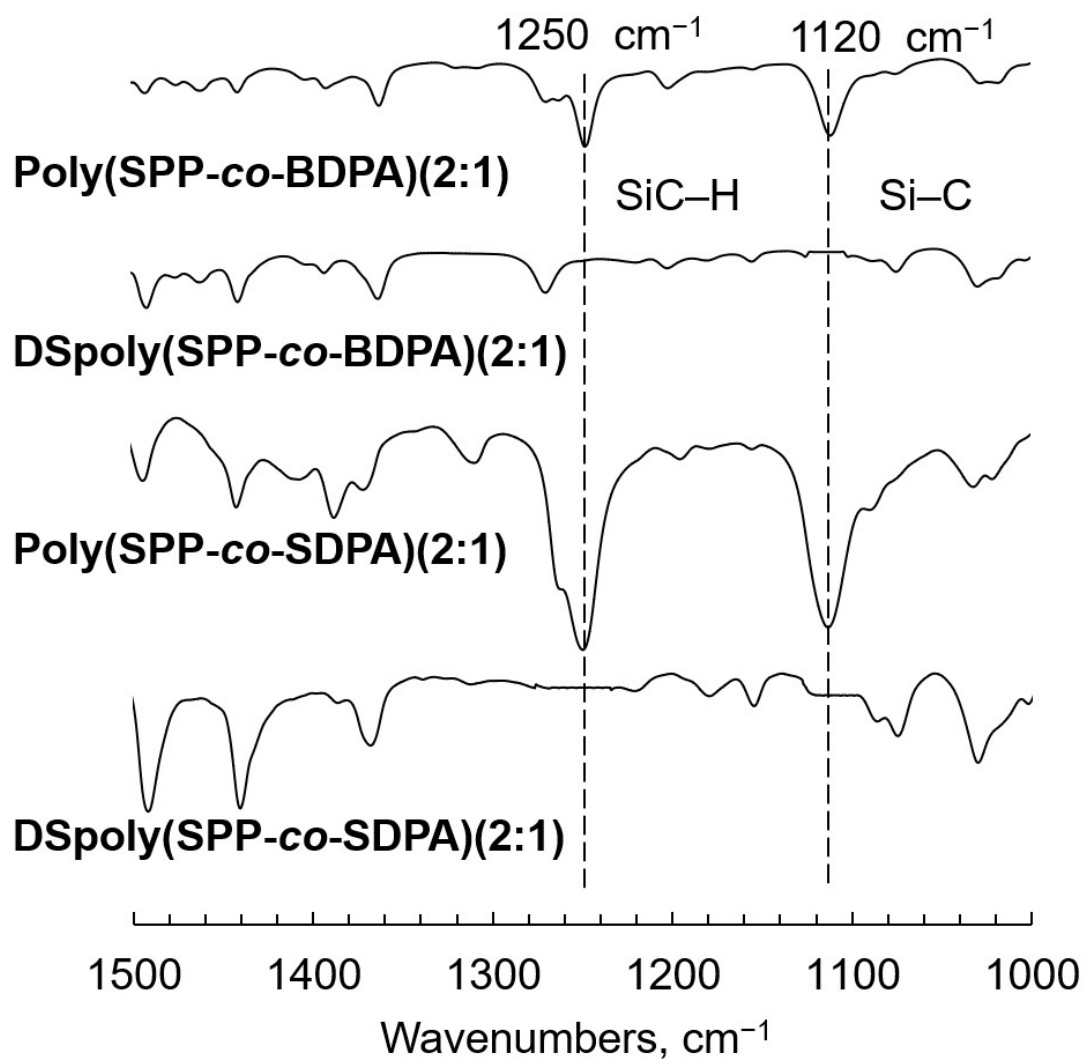

**Figure S14.** FT-IR spectra of **Poly(SPP-co-BDPA)(2:1)**, **Poly(SPP-co-SDPA)(2:1)**, **DSpoly(SPP-co-BDPA)(2:1)** and **DSpoly(SPP-co-SDPA)(2:1)**.

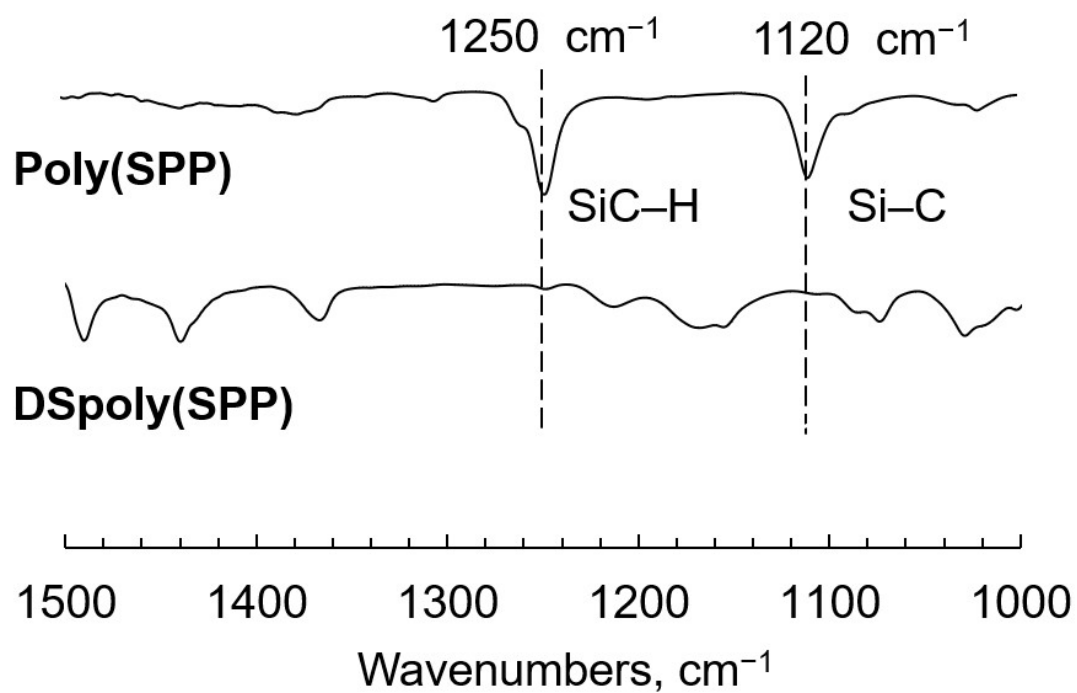

**Figure S15.** FT-IR spectra of **Poly(SPP)** and **DSpoly(SPP)**.



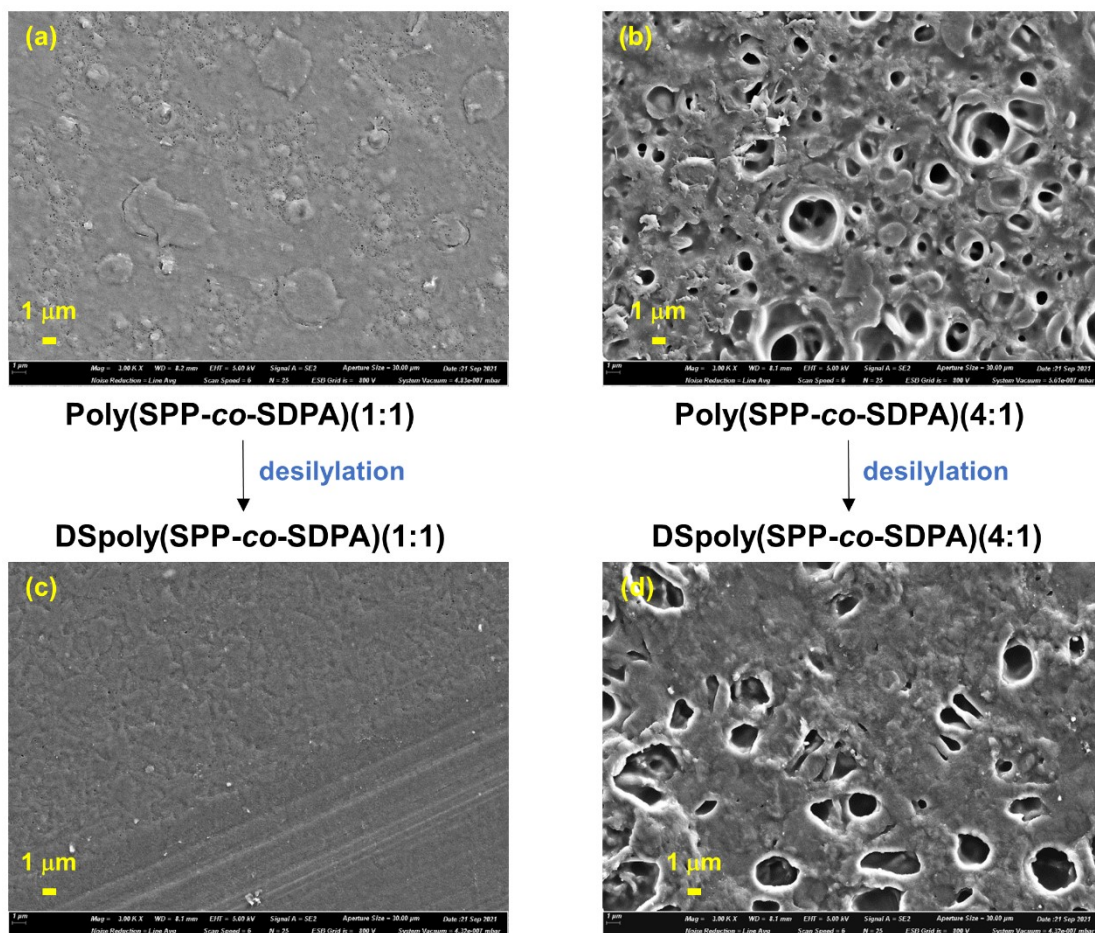

**Figure S16.** SEM images of membrane surfaces for (a) poly(SPP-co-SDPA)(1:1), (b) poly(SPP-co-SDPA)(4:1), (c) DSpoly(SPP-co-SDPA)(1:1), and (d) DSpoly(SPP-co-SDPA)(4:1).

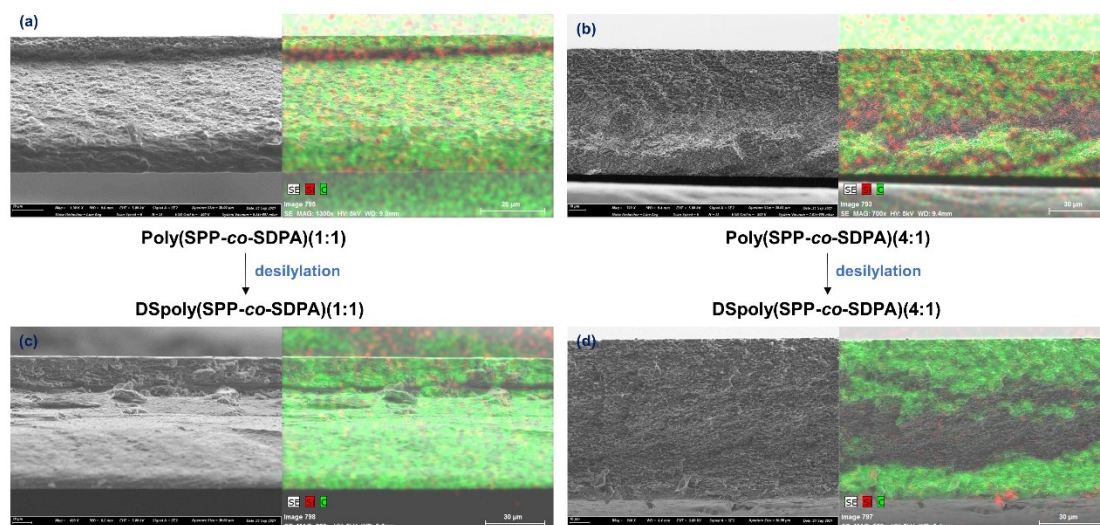

**Figure S17.** SEM images and signal maps of membrane cross-section for (a) poly(SPP-co-SDPA)(1:1), (b) poly(SPP-co-SDPA)(4:1), (c) DSpoly(SPP-co-SDPA)(1:1), and (d) DSpoly(SPP-co-SDPA)(4:1). The green and red regions correspond to carbon and silicon, respectively.

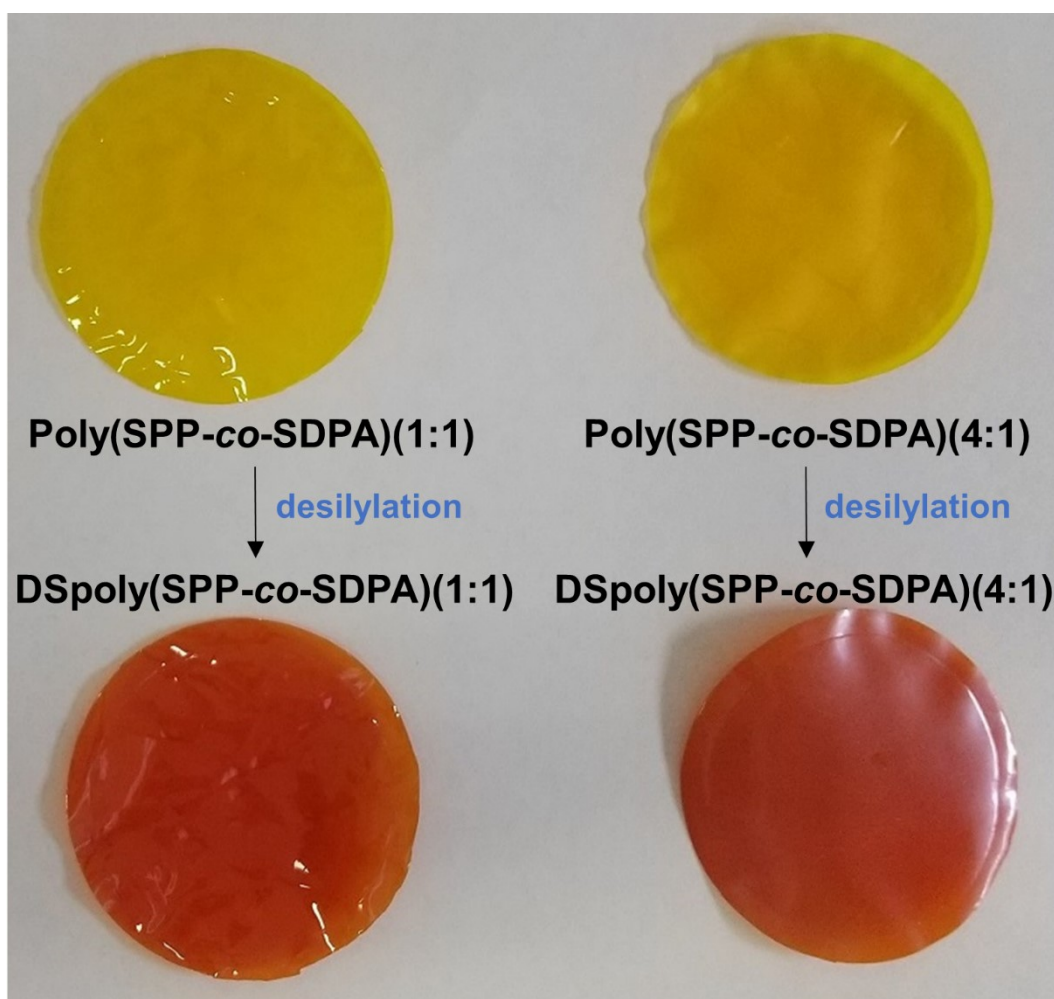

**Figure S18.** Photographs of poly(SPP-co-SDPA)(1:1), poly(SPP-co-SDPA)(4:1), DSpoly(SPP-co-SDPA)(1:1), and DSpoly(SPP-co-SDPA)(4:1).

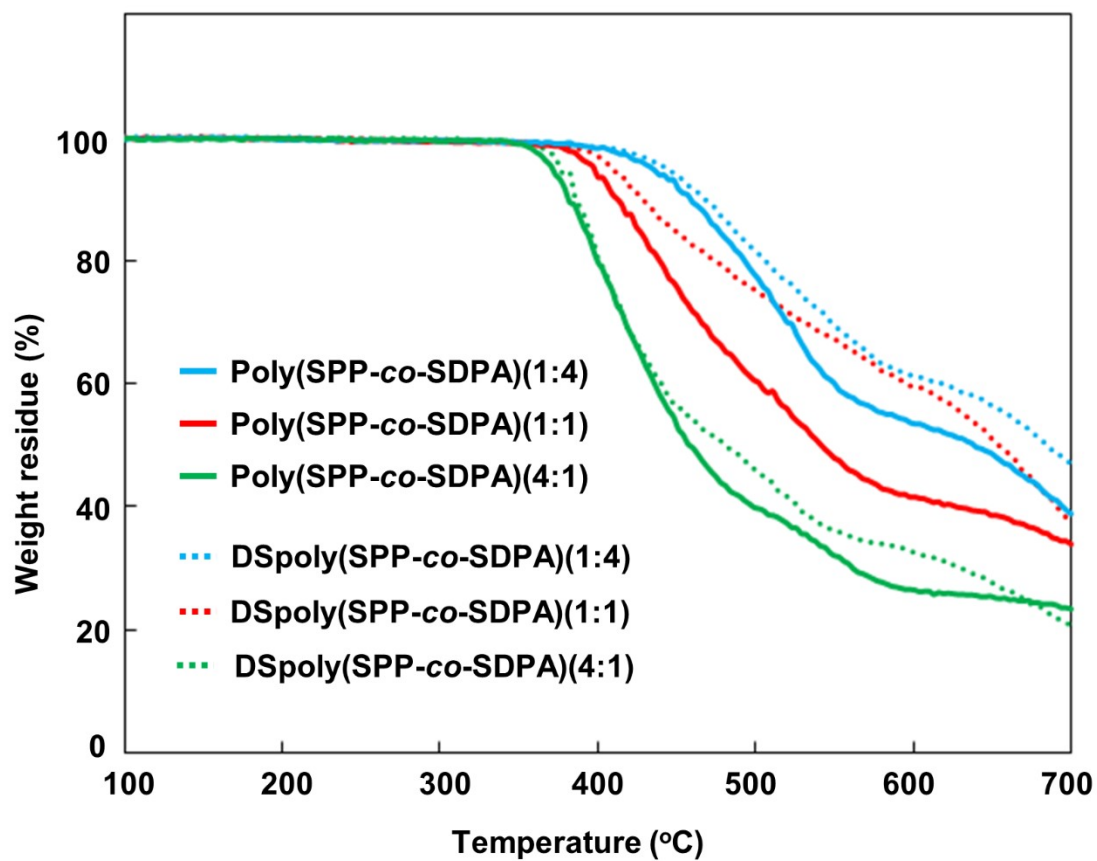

**Figure S19.** TGA curves of **poly(SPP-co-SDPA)s** and **DSpoly(SPP-co-SDPA)s**.
